# Supplementary material
Source: PubMed Central journal article supplement (PMC4313167)
Supplement: JCM.01432-14_zjm999093716so1.pdf [file JCM.01432-14_zjm999093716so1.pdf]

**Bacteriophage-based latex agglutination test for rapid identification of *Staphylococcus aureus***

Evgeny A. Idelevich, Thomas Walther, Sonja Molinaro, Xuehua Li, Guoqing Xia, Andreas Wieser, Georg Peters, Andreas Peschel, Karsten Becker

**Table S1.** Identification results for staphylococcal reference and type strains, n=126

| Reference strain <sup>a</sup>                      | Phage-based test <sup>b,c</sup> | Pastorex <sup>®</sup> |
|----------------------------------------------------|---------------------------------|-----------------------|
| <b><i>S. aureus</i> subsp. <i>aureus</i>, n=34</b> |                                 |                       |
| ATCC 13565                                         | +                               | +                     |
| ATCC 13709                                         | + <sup>d</sup>                  | + <sup>d</sup>        |
| ATCC 14458                                         | +                               | +                     |
| ATCC 19095                                         | +                               | +                     |
| ATCC 19636                                         | +                               | + <sup>d</sup>        |
| ATCC 23235                                         | +                               | +                     |
| ATCC 25904                                         | +                               | +                     |
| ATCC 25923                                         | +                               | +                     |
| ATCC 27664                                         | -                               | +                     |
| ATCC 29213                                         | +                               | +                     |
| ATCC 29247                                         | +                               | +                     |
| ATCC 33591                                         | +                               | +                     |
| ATCC 33592                                         | +                               | +                     |
| ATCC 43300                                         | +                               | +                     |
| ATCC 49230                                         | +                               | +                     |
| ATCC 49775                                         | +                               | +                     |

|                                                                |   |   |
|----------------------------------------------------------------|---|---|
| ATCC 51811                                                     | + | + |
| ATCC BAA-41                                                    | + | + |
| ATCC BAA-42                                                    | + | + |
| ATCC BAA-44                                                    | + | + |
| ATCC BAA-1683                                                  | + | + |
| ATCC BAA-1707                                                  | + | + |
| ATCC BAA-1717                                                  | + | + |
| ATCC BAA-1720                                                  | + | + |
| ATCC BAA-1747                                                  | + | + |
| ATCC BAA-1754                                                  | + | + |
| ATCC BAA-1761                                                  | + | + |
| ATCC BAA-1763                                                  | + | + |
| ATCC BAA-1764                                                  | + | + |
| ATCC BAA-1766                                                  | + | + |
| ATCC BAA-1768                                                  | + | + |
| ATCC BAA-2094                                                  | + | + |
| ATCC BAA-2313                                                  | + | + |
| DSM 20231 <sup>T</sup>                                         | + | + |
| <b><i>S. aureus</i> subsp. <i>anaerobius</i>, n=1</b>          |   |   |
| DSM 20714 <sup>T</sup>                                         | + | - |
| <b><i>Non-S. aureus</i>, n=91</b>                              |   |   |
| <i>S. agnetis</i> DSM 23656 <sup>T</sup>                       | - | - |
| <i>S. arlettae</i> DSM 20672 <sup>T</sup>                      | + | - |
| <i>S. auricularis</i> DSM 20609 <sup>T</sup>                   | - | - |
| <i>S. capitis</i> subsp. <i>capitis</i> DSM 20326 <sup>T</sup> | - | - |

|                                                                   |   |   |
|-------------------------------------------------------------------|---|---|
| <i>S. capitis</i> subsp. <i>capitis</i> DSM 6180                  | - | - |
| <i>S. capitis</i> subsp. <i>capitis</i> DSM 20325 <sup>T</sup>    | - | - |
| <i>S. capitis</i> subsp. <i>urealyticus</i> DSM 6717 <sup>T</sup> | - | - |
| <i>S. caprae</i> DSM 20608 <sup>T</sup>                           | - | - |
| <i>S. carnosus</i> subsp. <i>carnosus</i> DSM 20501 <sup>T</sup>  | - | - |
| <i>S. carnosus</i> subsp. <i>utilis</i> DSM 11676 <sup>T</sup>    | - | - |
| <i>S. chromogenes</i> DSM 20454 <sup>T</sup>                      | - | - |
| <i>S. cohnii</i> subsp. <i>cohnii</i> DSM 20260 <sup>T</sup>      | - | - |
| <i>S. cohnii</i> subsp. <i>cohnii</i> DSM 20261                   | - | - |
| <i>S. cohnii</i> subsp. <i>urealyticus</i> DSM 6718 <sup>T</sup>  | - | + |
| <i>S. condimenti</i> DSM 11674 <sup>T</sup>                       | - | - |
| <i>S. condimenti</i> DSM 11675                                    | - | - |
| <i>S. delphini</i> DSM 20771 <sup>T</sup>                         | - | - |
| <i>S. devriesei</i> CCUG 58238 <sup>T</sup>                       | - | + |
| <i>S. epidermidis</i> ATCC 14990 <sup>T</sup>                     | - | - |
| <i>S. epidermidis</i> ATCC 35984                                  | - | - |
| <i>S. epidermidis</i> DSM 1798                                    | - | - |
| <i>S. equorum</i> subsp. <i>equorum</i> DSM 20674 <sup>T</sup>    | + | - |
| <i>S. equorum</i> subsp. <i>equorum</i> DSM 20675                 | + | - |
| <i>S. equorum</i> subsp. <i>linens</i> DSM 15097 <sup>T</sup>     | - | - |
| <i>S. felis</i> DSM 7377 <sup>T</sup>                             | - | - |
| <i>S. fleurettii</i> DSM 13212 <sup>T</sup>                       | - | - |
| <i>S. gallinarum</i> DSM 20610 <sup>T</sup>                       | - | - |
| <i>S. haemolyticus</i> DSM 20263 <sup>T</sup>                     | - | - |
| <i>S. haemolyticus</i> DSM 20264                                  | - | - |

|                                                                          |    |    |
|--------------------------------------------------------------------------|----|----|
| <i>S. haemolyticus</i> DSM 20265                                         | -  | -  |
| <i>S. hominis</i> subsp. <i>hominis</i> DSM 20328 <sup>T</sup>           | -  | -  |
| <i>S. hominis</i> subsp. <i>hominis</i> DSM 20329                        | -  | -  |
| <i>S. hominis</i> subsp. <i>hominis</i> DSM 20330                        | -  | -  |
| <i>S. hominis</i> subsp. <i>novobiosepticus</i> ATCC 700236 <sup>T</sup> | -  | -  |
| <i>S. hyicus</i> DSM 20459 <sup>T</sup>                                  | -  | -  |
| <i>S. intermedius</i> DSM 20373 <sup>T</sup>                             | -  | -  |
| <i>S. intermedius</i> ATCC 49052                                         | -  | +  |
| <i>S. intermedius</i> ATCC 51874                                         | -  | -  |
| <i>S. kloosii</i> DSM 20676 <sup>T</sup>                                 | +  | -  |
| <i>S. kloosii</i> DSM 20677                                              | +  | -  |
| <i>S. lentus</i> DSM 20352 <sup>T</sup>                                  | -  | -  |
| <i>S. lugdunensis</i> DSM 4804 <sup>T</sup>                              | -  | -  |
| <i>S. lugdunensis</i> DSM 4805                                           | -  | +  |
| <i>S. lugdunensis</i> DSM 4806                                           | -  | -  |
| <i>S. lugdunensis</i> DSM 6670                                           | -  | -  |
| <i>S. lugdunensis</i> DSM 30716                                          | -  | -  |
| <i>S. lutrae</i> DSM 10244 <sup>T</sup>                                  | -  | -  |
| <i>S. lutrae</i> DSM 10245                                               | -  | -  |
| <i>S. microti</i> DSM 22147 <sup>T</sup>                                 | -  | -  |
| <i>S. muscae</i> DSM 7068 <sup>T</sup>                                   | -  | -  |
| <i>S. nepalensis</i> DSM 15150 <sup>T</sup>                              | -  | -  |
| <i>S. nepalensis</i> DSM 15151                                           | AA | -  |
| <i>S. nepalensis</i> DSM 20040                                           | -  | AA |
| <i>S. pasteurii</i> DSM 10656 <sup>T</sup>                               | +  | -  |

|                                                                            |   |    |
|----------------------------------------------------------------------------|---|----|
| <i>S. pettenkoferi</i> DSM 19554 <sup>T</sup>                              | - | -  |
| <i>S. piscifermentans</i> DSM 7373 <sup>T</sup>                            | - | -  |
| <i>S. pseudintermedius</i> LMG 22219 <sup>T</sup>                          | - | -  |
| <i>S. pseudintermedius</i> LMG 22220                                       | - | -  |
| <i>S. pseudintermedius</i> LMG 22221                                       | - | -  |
| <i>S. pseudintermedius</i> LMG 22222                                       | - | -  |
| <i>S. pseudintermedius</i> ATCC 49051                                      | - | -  |
| <i>S. rostri</i> DSM 21968 <sup>T</sup>                                    | - | -  |
| <i>S. saccharolyticus</i> DSM 20359 <sup>T</sup>                           | - | -  |
| <i>S. saprophyticus</i> subsp. <i>saprophyticus</i> DSM 20229 <sup>T</sup> | + | -  |
| <i>S. saprophyticus</i> subsp. <i>saprophyticus</i> DSM 20038              | + | -  |
| <i>S. saprophyticus</i> subsp. <i>bovis</i> CCM 4410 <sup>T</sup>          | + | +  |
| <i>S. schleiferi</i> subsp. <i>coagulans</i> DSM 6628 <sup>T</sup>         | - | -  |
| <i>S. schleiferi</i> subsp. <i>schleiferi</i> DSM 4807 <sup>T</sup>        | - | -  |
| <i>S. schleiferi</i> subsp. <i>schleiferi</i> DSM 4808                     | + | +  |
| <i>S. schleiferi</i> subsp. <i>schleiferi</i> DSM 4809                     | + | +  |
| <i>S. sciuri</i> subsp. <i>carnaticus</i> ATCC 700058 <sup>T</sup>         | - | -  |
| <i>S. sciuri</i> subsp. <i>rodentium</i> ATCC 700061 <sup>T</sup>          | - | AA |
| <i>S. sciuri</i> subsp. <i>sciuri</i> DSM 6671                             | - | AA |
| <i>S. sciuri</i> subsp. <i>sciuri</i> DSM 20345 <sup>T</sup>               | - | -  |
| <i>S. simiae</i> DSM 17636 <sup>T</sup>                                    | - | -  |
| <i>S. simiae</i> DSM 17637                                                 | - | -  |
| <i>S. simiae</i> DSM 17638                                                 | - | -  |
| <i>S. simiae</i> DSM 17639                                                 | - | -  |
| <i>S. simulans</i> DSM 20322 <sup>T</sup>                                  | - | -  |

|                                                                  |    |    |
|------------------------------------------------------------------|----|----|
| <i>S. simulans</i> DSM 20323                                     | -  | -  |
| <i>S. simulans</i> DSM 20723                                     | -  | -  |
| <i>S. stepanovicii</i> CCM 7717 <sup>T</sup>                     | -  | -  |
| <i>S. succinus</i> subsp. <i>casei</i> DSM 15096 <sup>T</sup>    | AA | AA |
| <i>S. succinus</i> subsp. <i>succinus</i> DSM 14617 <sup>T</sup> | -  | -  |
| <i>S. vitulinus</i> ATCC 51145 <sup>T</sup>                      | A  | AA |
| <i>S. vitulinus</i> DSM 9930                                     | -  | +  |
| <i>S. warneri</i> DSM 20036                                      | -  | -  |
| <i>S. warneri</i> DSM 20316 <sup>T</sup>                         | -  | -  |
| <i>S. xylosus</i> DSM 20266 <sup>T</sup>                         | +  | AA |
| <i>S. xylosus</i> DSM 6179                                       | +  | AA |
| <i>S. xylosus</i> DSM 20267                                      | AA | AA |

---

<sup>a</sup> T, type strain

<sup>b</sup> A, nonspecific agglutination only in control latex

<sup>c</sup> AA, nonspecific agglutination in test and control latex

<sup>d</sup> variable and delayed agglutination
